# Supplementary material
Source: PubMed Central journal article supplement (PMC4376586)
Supplement: NIHMS666501-supplement-1.pdf [file NIHMS666501-supplement-1.pdf]

## **Chen et al \_Inventory of Supplemental Materials**

### **Supplemental Figures and Figure Legends**

Figure S1, related to Figure 1

Figure S2, related to Figure 2

Figure S3, related to Figure 3

Figure S4, related to Figure 4

Figure S5, related to Figure 5

Figure S6, related to Figure 6

### **Supplemental Experimental Procedures**

#### **Supplemental Tables**

Table S1. List of genes differentially expressed at least >5-fold in o-GSCs relative to *Nf1*-deficient TVZ NSCs, related to Figure 6.

Table S2. List of genes differentially expressed at least <5-fold in o-GSCs relative to *Nf1*-deficient TVZ NSCs, related to Figure 6.

Table S3. Plasmids, related to Experimental Procedures.

Table S4. Antibodies, related to Experimental Procedures.

Table S5. qRT-PCR primers, related to Experimental Procedures.

### **Supplemental References**

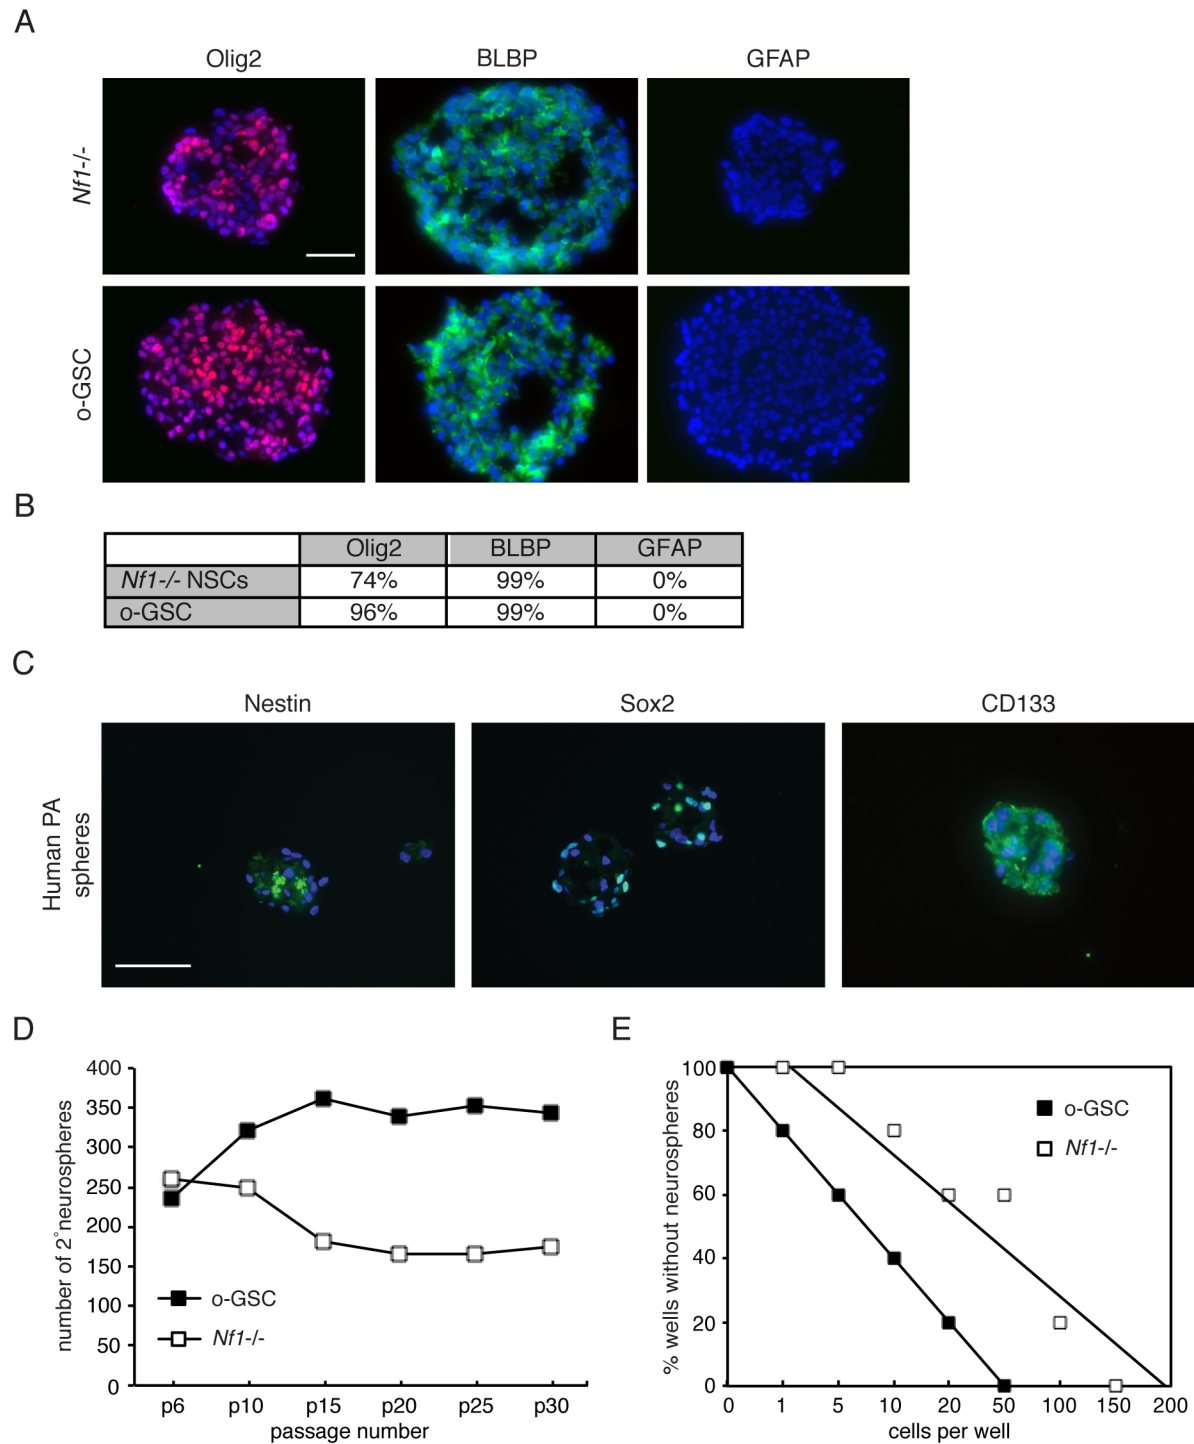

**Figure S1. Long-term culture of o-GSCs reveals no loss of stem cell function. (A)** *Nf1*<sup>-/-</sup> TVZ NSCs and o-GSCs both express Olig2 and BLBP, but not GFAP. **(B)** Quantitation of cell type-specific markers. **(C)** Spheres from human PA tumors express Nestin, Sox2, and CD133.

(D) Whereas o-GSCs exhibit increased numbers of secondary neurospheres with continued passage (>passage 6), reduced numbers were observed in *Nf1*<sup>-/-</sup> TVZ NSCs. (E) Fewer o-GSCs were required to generate one neurosphere by limiting dilution assay (passage 15). Scale bars, 100  $\mu$ m.

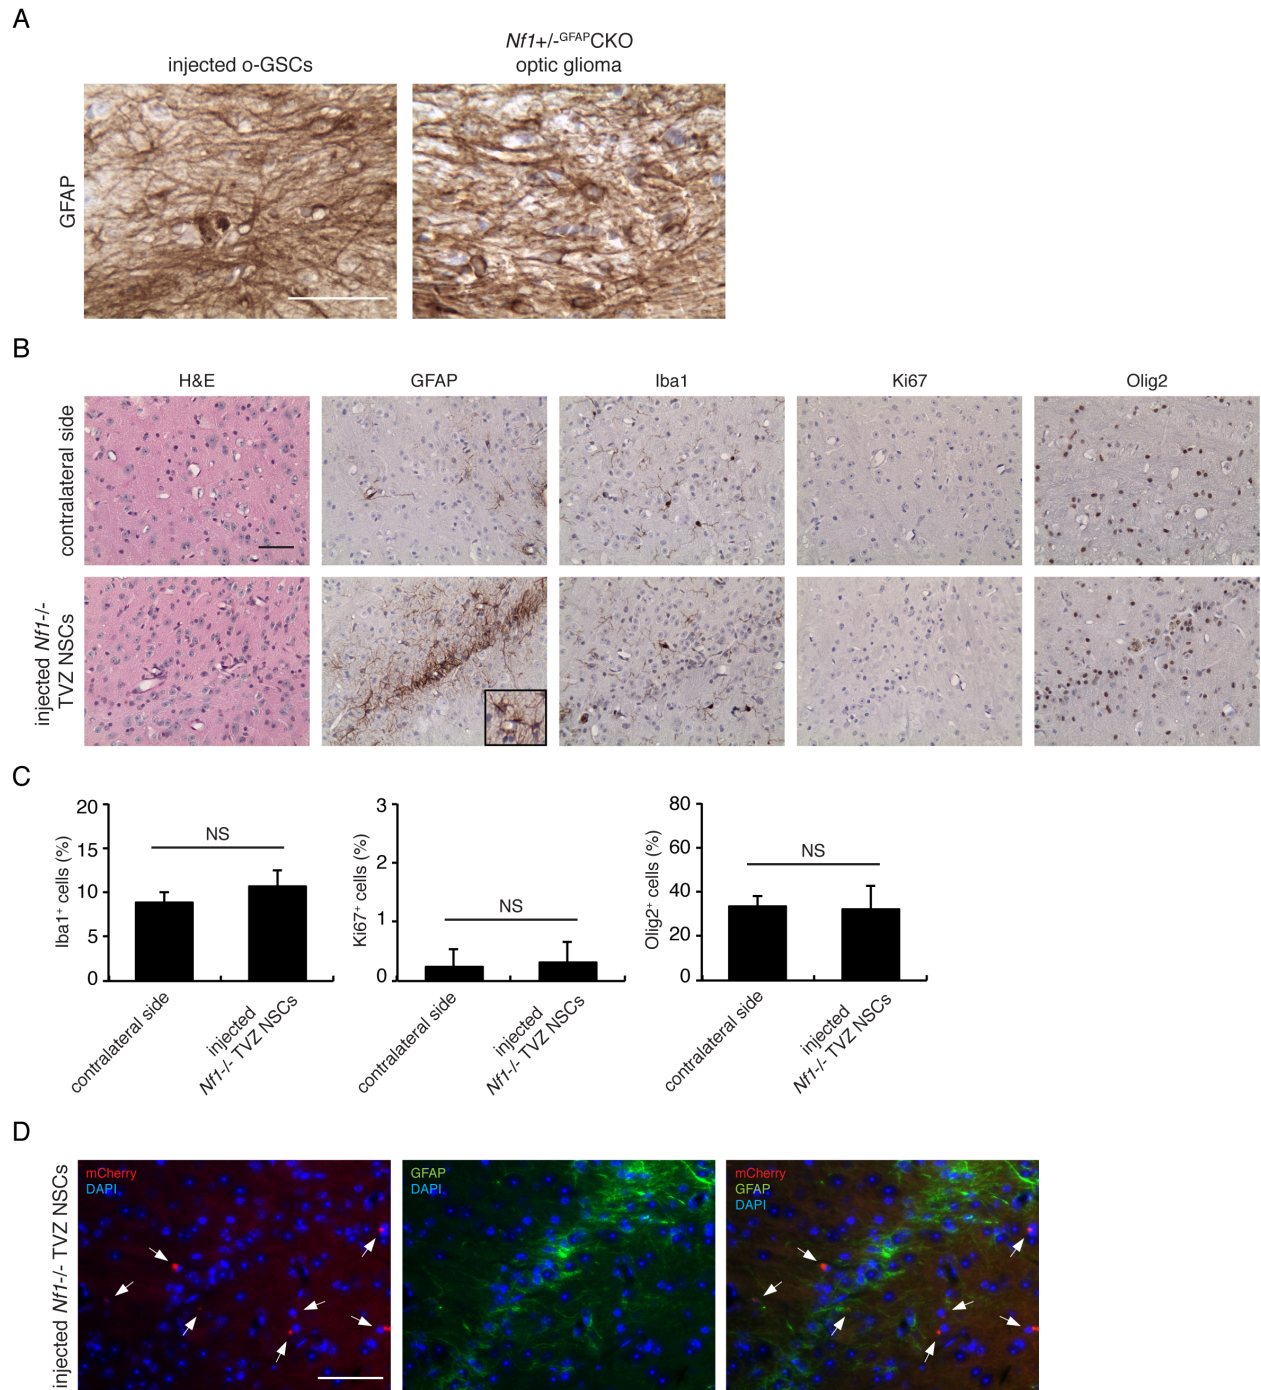

**Figure S2. CD133-negative *Nf1*-deficient TVZ NSCs do not form glioma-like lesions**

**following transplantation *in vivo*.** (A) A representative high-power magnification image of GFAP-expressing cells in a glioma-like lesion following o-GSC injection reveals similar astrocyte morphology to those found in the parental *Nf1* GEM optic gliomas. (B, C) Increased numbers of glial fibrillary acidic protein (GFAP)-immunoreactive cells were found in the brainstems of *Nf1*<sup>+/-</sup>

mice 6 months following the injection of *Nf1*-deficient TVZ NSCs. The GFAP<sup>+</sup> cells present at the injection sites had a stellate morphology (inset) typical of reactive astrocytes. Minimal changes in the numbers of Iba1<sup>+</sup> and Olig2<sup>+</sup> cells were observed. Importantly, only rare Ki67<sup>+</sup> cells were identified at the injection sites. The contralateral uninjected sides were used as reference controls. **(D)** mCherry-labeled cells were detected at the injection sites; however, the majority of the GFAP<sup>+</sup> cells were negative for mCherry immunostaining. Scale bars, 50  $\mu$ m. NS, not significant.

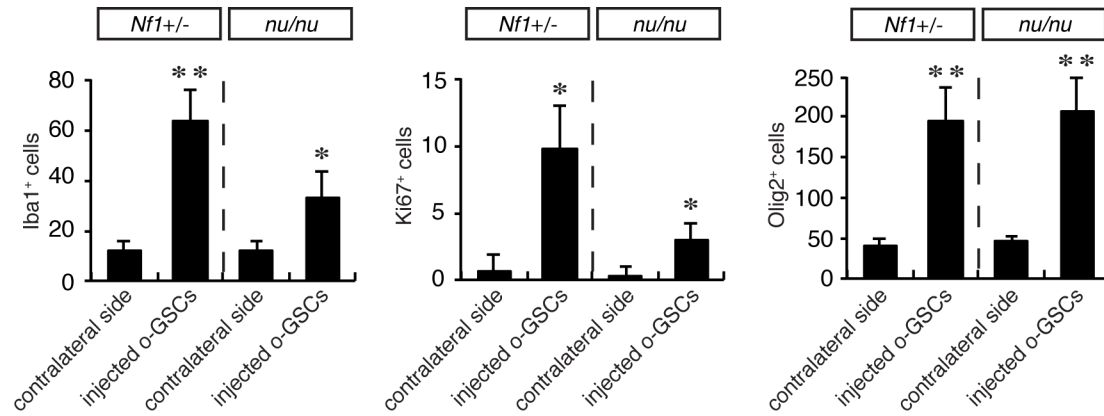

**Figure S3. The impact of the tumor microenvironment on o-GSC-induced gliomagenesis.**

Increased numbers of Iba1<sup>+</sup> and Ki67<sup>+</sup> cells per surface area (0.1 mm<sup>2</sup>) were observed following o-GSC injection into the brainstems of *Nf1*<sup>+/-</sup> mice relative to athymic (*nu/nu*) mice. Similar numbers of Olig2<sup>+</sup> cells were detected. (\*) p<0.05; (\*\*) p<0.01.

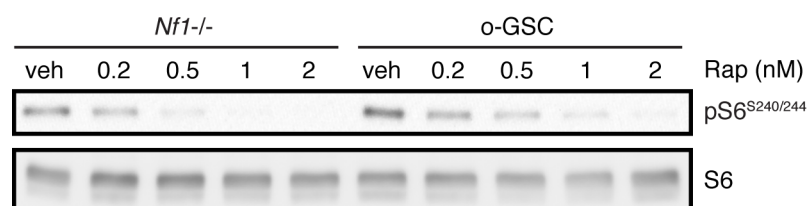

**Figure S4. Rapamycin treatment decreases mTOR activation.** *Nf1*<sup>-/-</sup> TVZ NSCs and o-GSCs show dose-dependent inhibition of mTOR activation following rapamycin treatment.

**A**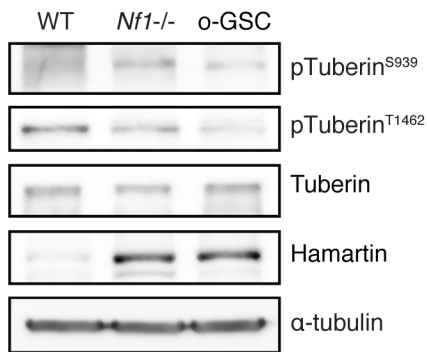**B**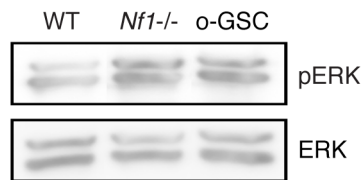

**Figure S5. RAS pathway signaling defects in o-GSCs. (A)** Decreased tuberin phosphorylation (Ser<sup>939</sup> and Thr<sup>1462</sup>) was observed in o-GSCs relative to WT controls, while hamartin expression was increased. **(B)** *Nf1*<sup>-/-</sup> TVZ NSCs and o-GSCs show similar levels of ERK activation.

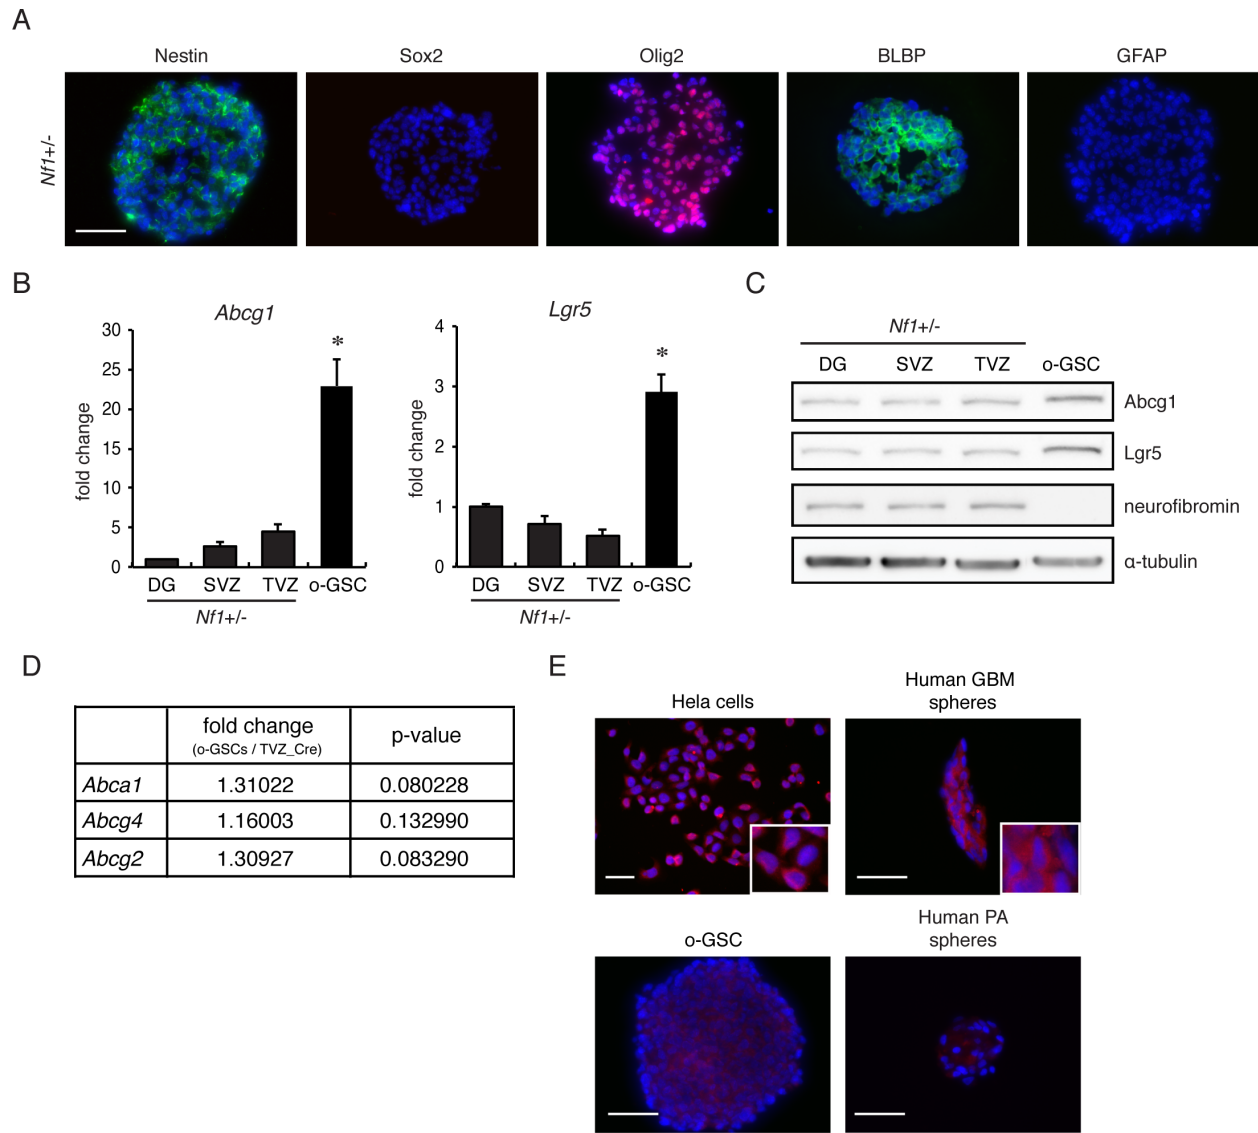

**Figure S6. o-GSCs exhibit increased *Abcg1* expression.** (A) Neurospheres generated from the TVZ of 3-month-old *Nf1*<sup>+/-</sup> mice were positive for nestin (green), Olig2 (red) and BLBP (green) expression, but negative for GFAP and Sox2 expression. (B) qRT-PCR analysis and (C) Western blotting demonstrated that *Abcg1* and *Lgr5* are highly expressed in o-GSCs relative to *Nf1*<sup>+/-</sup> NSCs from different brain regions. (D) RNA expression of other ATP-binding cassette (ABC) transporters (*Abca1*, *Abcg4*, *Abcg2*) were similar in o-GSCs relative to *Nf1*<sup>+/-</sup> NSCs. (E) In contrast to human GBM spheres, nearly absent *Abcg2* protein expression was found in o-

GSCs and human PA spheres. HeLa cells were used as a positive control for ABCG2 immunostaining. Scale bars, 100  $\mu\text{m}$ .

## **Supplemental Experimental Procedures**

### *Sectioning of neurospheres*

Neurospheres were fixed in 4% paraformaldehyde for 15 min followed by washing twice in PBS. Neurospheres were cryoprotected with 30% sucrose in 0.1 M phosphate buffer at 4°C overnight (von Holst et al., 2006). Fixed neurospheres were embedded in OCT compound and 10 µm sections generated on a microtome.

### *NSC self-renewal*

10 single neurospheres from each genotype were trypsinized and plated into individual wells of ultra-low binding 24 well plates with defined NSC medium containing N2, B27 supplement, EGF and FGF. After 7 days, the number of resulting secondary neurospheres was counted.

Supplements were added every 3 days.

### *Limiting dilution assay*

Limiting dilution analyses were performed as previously described (Dasgupta and Gutmann, 2005).

### *TUNEL staining*

Neurospheres were trypsinized and plated onto 50 µg/mL poly-D-lysine-coated and 10 µg/mL fibronectin-coated 24-well plates in defined NSC culture medium containing N2, B27 and growth factors. After 24 hrs, cells were fixed in 4% paraformaldehyde. TUNEL labeling was performed using a fluorescence-based *in situ* cell death detection kit (Roche Diagnostics). The percent of TUNEL-positive cells was determined as a percent of the total cell number (DAPI<sup>+</sup> cells).

**Table S1. List of genes differentially expressed at least >5-fold in o-GSCs relative to *Nf1*-deficient (TVZ\_Cre) NSCs.**

| RNA microarray (Fold Change) |                                                               |                     |                |
|------------------------------|---------------------------------------------------------------|---------------------|----------------|
| Gene Symbol                  |                                                               | FC (o-GSCs/TVZ_Cre) | <i>p</i> value |
| <i>Hoxa4</i>                 | homeobox A4                                                   | 55.63               | 0.0007         |
| <i>Dmp1</i>                  | dentin matrix protein 1                                       | 43.02               | 0.0017         |
| <i>Tmem204</i>               | transmembrane protein 204                                     | 31.98               | 0.0003         |
| <i>Neurod1</i>               | neurogenic differentiation 1                                  | 28.13               | 0.0001         |
| <i>Foxd1</i>                 | forkhead box D1                                               | 20.93               | 0.0001         |
| <i>Arpp21</i>                | Cyclic AMP-regulated phosphoprotein, 21                       | 20.79               | 0.0043         |
| <i>Gabra2</i>                | Gamma-aminobutyric acid (GABA) A receptor, subunit alpha 2    | 19.75               | 0.0016         |
| <i>Bves</i>                  | blood vessel epicardial substance                             | 19.60               | 0.0003         |
| <i>Casp12</i>                | Caspase 12                                                    | 16.95               | 0.0018         |
| <i>Kcnj15</i>                | potassium inwardly-rectifying channel, subfamily J, member 15 | 16.45               | 0.0002         |
| <i>Zfp616</i>                | zinc finger protein 616                                       | 16.20               | 0.0010         |
| <i>Hoxa5</i>                 | homeobox A5                                                   | 15.74               | 0.0035         |
| <i>Cgnl1</i>                 | cingulin-like 1                                               | 15.41               | 0.0043         |
| <i>Abcg1</i>                 | ATP-binding cassette, sub-family G, member 1                  | 15.14               | 0.0010         |
| <i>Hoxa3</i>                 | homeobox A3                                                   | 14.77               | 0.0002         |
| <i>Gria4</i>                 | glutamate receptor, ionotropic, AMPA4 (alpha 4)               | 14.70               | 0.0010         |
| <i>St3gal6</i>               | ST3 beta-galactoside alpha-2,3-sialyltransferase 6            | 14.14               | 0.0002         |
| <i>Enpep</i>                 | glutamyl aminopeptidase                                       | 13.22               | 0.0032         |
| <i>Kcnip3</i>                | Kv channel interacting protein 3, calsenilin                  | 12.72               | 0.0046         |
| <i>Pcdh10</i>                | protocadherin 10                                              | 12.02               | 0.0047         |
| <i>Cml2</i>                  | camello-like 2                                                | 11.65               | 0.0008         |
| <i>Pappa</i>                 | pappalysin 2                                                  | 11.19               | 0.0026         |
| <i>Lipk</i>                  | lipase, family member K                                       | 11.11               | 0.0016         |
| <i>Gabrd</i>                 | gamma-aminobutyric acid (GABA) A receptor, subunit delta      | 11.00               | 0.0011         |
| <i>Nodal</i>                 | Nodal                                                         | 10.75               | 0.0031         |

|                   |                                                                       |       |        |
|-------------------|-----------------------------------------------------------------------|-------|--------|
| <i>Fam70a</i>     | family with sequence similarity 70, member A                          | 10.10 | 0.0035 |
| <i>Kif5a</i>      | kinesin family member 5A                                              | 10.09 | 0.0033 |
| <i>Lpl</i>        | lipoprotein lipase                                                    | 9.30  | 0.0014 |
| <i>Htr3b</i>      | 5-hydroxytryptamine (serotonin) receptor 3B                           | 8.86  | 0.0001 |
| <i>Kndc1</i>      | kinase non-catalytic C-lobe domain (KIND) containing 1                | 8.83  | 0.0001 |
| <i>Polh</i>       | polymerase (DNA directed), eta (RAD 30 related)                       | 8.77  | 0.0004 |
| <i>Pcdh15</i>     | protocadherin 15                                                      | 8.77  | 0.0035 |
| <i>Speer5-ps1</i> | spermatogenesis associated glutamate (E)-rich protein 5, pseudogene 1 | 8.75  | 0.0042 |
| <i>Apob48r</i>    | Apolipoprotein B48 receptor                                           | 8.48  | 0.0018 |
| <i>Car6</i>       | carbonic anhydrase 6                                                  | 8.22  | 0.0004 |
| <i>Stom</i>       | stomatin                                                              | 7.69  | 0.0006 |
| <i>Jph3</i>       | junctophilin 3                                                        | 7.67  | 0.0018 |
| <i>Pcdh17</i>     | protocadherin 17                                                      | 7.67  | 0.0027 |
| <i>Bcas1</i>      | breast carcinoma amplified sequence 1                                 | 7.65  | 0.0004 |
| <i>Atad2</i>      | ATPase family, AAA domain containing 2                                | 7.25  | 0.0038 |
| <i>Map6d1</i>     | MAP6 domain containing 1                                              | 7.19  | 0.0025 |
| <i>Car10</i>      | carbonic anhydrase 10                                                 | 7.11  | 0.0007 |
| <i>Nav3</i>       | neuron navigator 3                                                    | 6.99  | 0.0009 |
| <i>Pdgfd</i>      | platelet-derived growth factor, D polypeptide                         | 6.87  | 0.0008 |
| <i>Mbd5</i>       | methyl-CpG binding domain protein 5                                   | 6.73  | 0.0029 |
| <i>Lgr5</i>       | leucine rich repeat containing G protein coupled receptor 5           | 6.71  | 0.0019 |
| <i>Endod1</i>     | endonuclease domain containing 1                                      | 6.40  | 0.0040 |
| <i>Alcam</i>      | activated leukocyte cell adhesion molecule                            | 6.38  | 0.0033 |
| <i>Fgf12</i>      | fibroblast growth factor 12                                           | 6.30  | 0.0049 |
| <i>Hgf</i>        | hepatocyte growth factor                                              | 6.21  | 0.0048 |
| <i>Mgat4a</i>     | mannoside acetylglucosaminyltransferase 4, isoenzyme A                | 6.12  | 0.0040 |
| <i>Cox8b</i>      | cytochrome c oxidase, subunit VIIIb                                   | 6.05  | 0.0046 |
| <i>Tac1</i>       | tachykinin 1                                                          | 5.68  | 0.0049 |

|               |                                                 |      |        |
|---------------|-------------------------------------------------|------|--------|
| <i>Cys1</i>   | cystin 1                                        | 5.40 | 0.0048 |
| <i>Grid2</i>  | glutamate receptor, ionotropic, delta 2         | 5.35 | 0.0017 |
| <i>Olfm2</i>  | olfactomedin 2                                  | 5.31 | 0.0049 |
| <i>Fam63a</i> | family with sequence similarity 63,<br>member A | 5.30 | 0.0034 |
| <i>Sox12</i>  | SRY-box containing gene 12                      | 5.22 | 0.0013 |
| <i>Cela1</i>  | chymotrypsin-like elastase family,<br>member 1  | 5.21 | 0.0017 |

---

**Table S2. List of genes differentially expressed at least <5-fold in o-GSCs relative to *Nf1*-deficient (TVZ\_Cre) NSCs.**

| RNA microarray (Fold Change) |                                                                                              |                     |                |
|------------------------------|----------------------------------------------------------------------------------------------|---------------------|----------------|
| Gene Symbol                  |                                                                                              | FC (o-GSCs/TVZ_Cre) | <i>p</i> value |
| <i>Fbln2</i>                 | fibulin 2                                                                                    | -703.24             | 0.0024         |
| <i>Otx2</i>                  | Otx2 opposite strand transcript 1                                                            | -486.93             | 0.0002         |
| <i>Car8</i>                  | carbonic anhydrase 8                                                                         | -41.96              | 0.0001         |
| <i>Serpinh1</i>              | serine (or cysteine) peptidase inhibitor, clade H, member 1                                  | -38.77              | 0.0010         |
| <i>Aldh1l1</i>               | Aldehyde dehydrogenase 1 family, member L1                                                   | -34.52              | 0.0011         |
| <i>Aqp4</i>                  | aquaporin 4                                                                                  | -33.56              | 0.0044         |
| <i>Pcp4l1</i>                | Purkinje cell protein 4-like 1                                                               | -30.75              | 0.0018         |
| <i>Slc25a31</i>              | solute carrier family 25 (mitochondrial carrier; adenine nucleotide translocator), member 31 | -29.42              | 0.0002         |
| <i>Nebi</i>                  | nebulette                                                                                    | -26.39              | 0.0015         |
| <i>Rgs16</i>                 | regulator of G-protein signaling 16                                                          | -25.91              | 0.0045         |
| <i>Zcchc12</i>               | zinc finger, CCHC domain containing 12                                                       | -23.39              | 0.0005         |
| <i>Kcne1l</i>                | potassium voltage-gated channel, Isk-related family, member 1-like                           | -20.38              | 0.0045         |
| <i>Trpm3</i>                 | transient receptor potential cation channel, subfamily M, member 3                           | -19.20              | 0.0035         |
| <i>Pitx2</i>                 | paired-like homeodomain transcription factor 2                                               | -18.39              | 0.0001         |
| <i>Emid1</i>                 | EMI domain containing 1                                                                      | -18.04              | 0.0049         |
| <i>Ccdc151</i>               | coiled-coil domain containing 151                                                            | -17.93              | 0.0002         |
| <i>Stk33</i>                 | serine/threonine kinase 33                                                                   | -15.29              | 0.0045         |
| <i>Tgfb3</i>                 | transforming growth factor, beta 3                                                           | -14.73              | 0.0008         |
| <i>Eya2</i>                  | eyes absent 2 homolog ( <i>Drosophila</i> )                                                  | -14.64              | 0.0017         |
| <i>Prdxdd1</i>               | PrdX-deacylase domain 1                                                                      | -14.49              | 0.0021         |
| <i>Gria1</i>                 | glutamate receptor, ionotropic, AMPA1 (alpha 1)                                              | -14.34              | 0.0013         |
| <i>Flywch2</i>               | FLYWCH family member 2                                                                       | -14.25              | 0.0014         |
| <i>Sulf1</i>                 | sulfatase 1                                                                                  | -13.39              | 0.0007         |
| <i>Nrn1</i>                  | neuritin 1                                                                                   | -13.39              | 0.0001         |

|                |                                                                     |        |        |
|----------------|---------------------------------------------------------------------|--------|--------|
| <i>Rbp1</i>    | retinol binding protein 1, cellular                                 | -13.25 | 0.0000 |
| <i>H19</i>     | H19 fetal liver mRNA                                                | -12.33 | 0.0003 |
| <i>Igf1</i>    | insulin-like growth factor 1                                        | -12.19 | 0.0001 |
| <i>Gbp2</i>    | guanylate binding protein 2                                         | -11.75 | 0.0000 |
| <i>Peg3</i>    | paternally expressed 3                                              | -11.30 | 0.0001 |
| <i>Crx</i>     | cone-rod homeobox containing gene                                   | -11.29 | 0.0041 |
| <i>Ctsc</i>    | cathepsin C                                                         | -11.16 | 0.0004 |
| <i>Parvb</i>   | Parvin, beta                                                        | -10.94 | 0.0020 |
| <i>Nkain2</i>  | Na <sup>+</sup> /K <sup>+</sup> transporting ATPase interacting 2   | -10.89 | 0.0004 |
| <i>Fam101a</i> | family with sequence similarity 101, member A                       | -10.18 | 0.0019 |
| <i>Psg19</i>   | pregnancy specific glycoprotein 19                                  | -10.17 | 0.0028 |
| <i>Foxa1</i>   | Forkhead box A1                                                     | -9.81  | 0.0026 |
| <i>Iqcg</i>    | Leucine-rich repeats and calponin homology (CH) domain containing 3 | -9.74  | 0.0024 |
| <i>Spef2</i>   | sperm flagellar 2                                                   | -9.69  | 0.0034 |
| <i>Rbp3</i>    | retinol binding protein 3, interstitial                             | -9.69  | 0.0000 |
| <i>Cldn1</i>   | claudin 1                                                           | -9.62  | 0.0021 |
| <i>Kcnf1</i>   | potassium voltage-gated channel, subfamily F, member 1              | -9.59  | 0.0038 |
| <i>Itih5</i>   | inter-alpha (globulin) inhibitor H5                                 | -9.43  | 0.0036 |
| <i>Cxcr4</i>   | chemokine (C-X-C motif) receptor 4                                  | -9.26  | 0.0013 |
| <i>Mmp14</i>   | matrix metalloproteinase 14 (membrane-inserted)                     | -9.22  | 0.0006 |
| <i>Ripk3</i>   | receptor-interacting serine-threonine kinase 3                      | -9.07  | 0.0001 |
| <i>Prdm16</i>  | PR domain containing 16                                             | -8.79  | 0.0009 |
| <i>Agtrap</i>  | angiotensin II, type I receptor-associated protein                  | -8.73  | 0.0008 |
| <i>Thbs2</i>   | thrombospondin 2                                                    | -8.70  | 0.0034 |
| <i>Cybrd1</i>  | cytochrome b reductase 1                                            | -8.39  | 0.0002 |
| <i>Tmem146</i> | transmembrane protein 146                                           | -8.33  | 0.0005 |
| <i>Cgref1</i>  | cell growth regulator with EF hand domain 1                         | -8.28  | 0.0001 |
| <i>Ereg</i>    | epiregulin                                                          | -8.11  | 0.0010 |
| <i>Ptx3</i>    | pentraxin related gene                                              | -8.09  | 0.0043 |

|                |                                                          |       |        |
|----------------|----------------------------------------------------------|-------|--------|
| <i>Mpg</i>     | N-methylpurine-DNA glycosylase                           | -7.89 | 0.0008 |
| <i>Fbxw27</i>  | F-box and WD-40 domain protein 27                        | -7.86 | 0.0023 |
| <i>Rpp25</i>   | ribonuclease P 25 subunit                                | -7.83 | 0.0012 |
| <i>B9d1</i>    | B9 protein domain 1                                      | -7.69 | 0.0047 |
| <i>Pkp2</i>    | plakophilin 2                                            | -7.65 | 0.0021 |
| <i>Mfap2</i>   | microfibrillar-associated protein 2                      | -7.57 | 0.0027 |
| <i>A2m</i>     | alpha-2-macroglobulin                                    | -7.37 | 0.0005 |
| <i>Vasn</i>    | vasorin                                                  | -7.37 | 0.0037 |
| <i>Emcn</i>    | endomucin                                                | -7.05 | 0.0050 |
| <i>Bcl11b</i>  | B-cell leukemia/lymphoma 11B                             | -7.02 | 0.0047 |
| <i>Gng2</i>    | guanine nucleotide binding protein (G protein), gamma 2  | -6.74 | 0.0036 |
| <i>Mdk</i>     | midkine                                                  | -6.73 | 0.0025 |
| <i>Cnn2</i>    | calponin 2                                               | -6.64 | 0.0039 |
| <i>Dzip1</i>   | DAZ interacting protein 1                                | -6.63 | 0.0047 |
| <i>Cx3cl1</i>  | chemokine (C-X3-C motif) ligand 1                        | -6.57 | 0.0050 |
| <i>Naprt1</i>  | nicotinate phosphoribosyltransferase domain containing 1 | -6.48 | 0.0024 |
| <i>Anxa1</i>   | annexin A1                                               | -6.27 | 0.0008 |
| <i>Emx2</i>    | empty spiracles homolog 2                                | -6.24 | 0.0031 |
| <i>Myom1</i>   | myomesin 1                                               | -6.19 | 0.0031 |
| <i>Tox2</i>    | TOX high mobility group box family member 2              | -6.14 | 0.0013 |
| <i>Tppp3</i>   | tubulin polymerization-promoting protein family member 3 | -6.10 | 0.0004 |
| <i>Thrsp</i>   | thyroid hormone responsive SPOT14 homolog                | -5.95 | 0.0044 |
| <i>Npnt</i>    | nephronectin                                             | -5.71 | 0.0003 |
| <i>Afap1</i>   | actin filament associated protein 1                      | -5.59 | 0.0006 |
| <i>Loxl1</i>   | lysyl oxidase-like 1                                     | -5.53 | 0.0031 |
| <i>Ezr</i>     | Ezrin                                                    | -5.52 | 0.0034 |
| <i>Gabbr1</i>  | gamma-aminobutyric acid (GABA) B receptor, 1             | -5.43 | 0.0031 |
| <i>Gbp1</i>    | guanylate binding protein 1                              | -5.27 | 0.0015 |
| <i>Col5a2</i>  | collagen, type V, alpha 2                                | -5.25 | 0.0010 |
| <i>Klhdc8b</i> | kelch domain containing 8B                               | -5.23 | 0.0006 |

|              |                                              |       |        |
|--------------|----------------------------------------------|-------|--------|
| <i>Wdr78</i> | WD repeat domain 78                          | -5.18 | 0.0031 |
| <i>Wnt5a</i> | wingless-related MMTV integration site<br>5A | -5.18 | 0.0048 |
| <i>Eya4</i>  | eyes absent 4 homolog                        | -5.16 | 0.0039 |
| <i>Hoxc8</i> | homeobox C8                                  | -5.05 | 0.0037 |

---

**Table S3. Plasmids.**

| <b><u>Construct</u></b>             | <b><u>Source</u></b>                          |
|-------------------------------------|-----------------------------------------------|
| <i>mCherry-FUW</i>                  | Dr. Joshua Rubin, Washington University       |
| <i>shAbcg1</i> NM_009593.1-2038s1c1 | The Genome Institute at Washington University |
| <i>shAbcg1</i> NM_009593.1-1161s1c1 | The Genome Institute at Washington University |
| <i>shGFP</i>                        | The Genome Institute at Washington University |

**Table S4. Antibodies.**

| <b><u>Antibody</u></b>                  | <b><u>Host</u></b> | <b><u>Source</u></b>               | <b><u>Dilution</u></b>             |
|-----------------------------------------|--------------------|------------------------------------|------------------------------------|
| Tuj-1 (ICC)                             | Mouse              | Covance                            | 1:1000                             |
| O4 (ICC)                                | Mouse              | Chemicon                           | 1:1000                             |
| GFAP (ICC)                              | Mouse              | Millipore                          | 1:500                              |
| GFAP (IHC)                              | Rat                | Invitrogen                         | 1:200                              |
| Nestin (ICC)                            | Mouse              | Abcam                              | 1:500                              |
| Sox2 (ICC)                              | Mouse              | Abcam                              | 1:500                              |
| BLBP (ICC)                              | Rabbit             | Millipore                          | 1:500                              |
| Olig2 (IHC, ICC)                        | Rabbit             | Millipore                          | 1:500                              |
| CD133 (ICC)                             | Rat                | eBioscience                        | 1:100                              |
| CD133 (ICC)                             | Mouse              | Biorbyt                            | 1:400                              |
| A2B5 (ICC)                              | Mouse              | A2B5 clone 105<br>hybridoma (ATCC) | 1:50                               |
| CD15 (ICC)                              | Mouse              | STEMCELL                           | 1:100                              |
| CD49f (ICC)                             | Mouse              | Thermo                             | 1:100                              |
| Iba1 (IHC)                              | Rabbit             | Wako                               | 1:1000                             |
| Ki67 (IHC, IF, ICC)                     | Mouse              | BD Pharmingen                      | 1:500                              |
| mCherry (IF)                            | Rabbit             | Abcam                              | 1:250                              |
| Lgr5 (WB, ICC)                          | Rabbit             | Abcam                              | WB 1:1000<br>ICC 1:500             |
| Lgr5 (IHC)                              | Rabbit             | Abcam                              | 1:100                              |
| Abcg1 (WB, IHC, ICC)                    | Rabbit             | GeneTex                            | WB 1:2000<br>IHC 1:50<br>ICC 1:400 |
| phospho-S6 <sup>Ser240/244</sup> (WB)   | Rabbit             | Cell Signaling                     | 1:5000                             |
| phospho-RSK <sup>Thr573</sup> (WB)      | Rabbit             | Cell Signaling                     | 1:1000                             |
| phospho-Tuberin <sup>Ser939</sup> (WB)  | Rabbit             | Cell Signaling                     | 1:1000                             |
| phospho-Tuberin <sup>Thr1462</sup> (WB) | Rabbit             | Cell Signaling                     | 1:1000                             |

|                                           |        |                |                      |
|-------------------------------------------|--------|----------------|----------------------|
| phospho-ERK <sup>Thr202/Tyr204</sup> (WB) | Rabbit | Cell Signaling | 1:8000               |
| phospho-MEK1/2 <sup>Ser217/221</sup> (WB) | Rabbit | Cell Signaling | 1:1000               |
| phospho-CRAF <sup>Ser338</sup> (WB)       | Rabbit | Cell Signaling | 1:1000               |
| S6 (WB)                                   | Rabbit | Cell Signaling | 1:8000               |
| Tuberin (WB)                              | Rabbit | Cell Signaling | 1:1000               |
| RSK (p90-RSK)                             | Rabbit | Cell Signaling | 1:1000               |
| ERK (WB)                                  | Rabbit | Cell Signaling | 1:1000               |
| MEK1 (IP, WB)                             | Mouse  | Cell Signaling | IP 1:50<br>WB 1:3000 |
| MEK1/2 (WB)                               | Rabbit | Cell Signaling | 1:1000               |
| CRAF (WB)                                 | Rabbit | Cell Signaling | 1:500                |
| Caspases (WB)                             | Rabbit | Cell Signaling | 1:1000               |
| Cleaved PARP (WB)                         | Rabbit | Cell Signaling | 1:500                |
| BiP (WB)                                  | Rabbit | Cell Signaling | 1:1000               |
| CHOP (WB)                                 | Mouse  | Cell Signaling | 1:1000               |
| Abcg2 (ICC)                               | Mouse  | Abcam          | 1:100                |
| Neurofibromin (WB)                        | Rabbit | Santa Cruz     | 1:250                |
| $\alpha$ -tubulin (WB)                    | Mouse  | Sigma          | 1:20,000             |

WB: Western Blot, IP: Immunoprecipitation, IHC: Immunohistochemistry,

IF: immunofluorescence, ICC: Immunocytochemistry

**Table S5. Primers.**

| <b>Gene</b>                     | <b>Accession #</b> | <b>Forward primer</b>                 | <b>Reverse primer</b>                 |
|---------------------------------|--------------------|---------------------------------------|---------------------------------------|
| <i>Lgr5</i>                     | NM_010195          | 5'-<br>CCACAGCCTGGAGACTTTAGATT-<br>3' | 5'-<br>TGTTGTTGCTGTGGAATCCTAGT-<br>3' |
| <i>Abcg1</i>                    | NM_009593          | 5'-TGCGAGAGGGCATGTGTGAC-<br>3'        | 5'-GGAGGCGGAGTCCTCTTCAG-<br>3'        |
| <i>H3f3a</i><br>(house-keeping) | NM_008210          | 5'-<br>CGTGAAATCAGACGCTATCAGAA<br>-3' | 5'- TCGCACCAGACGCTGAAAG -<br>3'       |

## **Supplemental References**

Dasgupta, B., and Gutmann, D.H. (2005). Neurofibromin regulates neural stem cell proliferation, survival, and astroglial differentiation in vitro and in vivo. *J Neurosci* 25, 5584-5594.

von Holst, A., Sirko, S., and Faissner, A. (2006). The unique 473HD-Chondroitinsulfate epitope is expressed by radial glia and involved in neural precursor cell proliferation. *J Neurosci* 26, 4082-4094.
